# Supplementary material
Source: PubMed Central journal article supplement (PMC8136521)
Supplement: ehp8171.s001.acco.pdf [file ehp8171.s001.acco.pdf]

**Note to readers with disabilities:** *EHP* strives to ensure that all journal content is accessible to all readers. However, some figures and Supplemental Material published in *EHP* articles may not conform to [508 standards](#) due to the complexity of the information being presented. If you need assistance accessing journal content, please contact [ehp508@niehs.nih.gov](mailto:ehp508@niehs.nih.gov). Our staff will work with you to assess and meet your accessibility needs within 3 working days.

### **Supplemental Material**

#### **Sex-Specific Effects of Prenatal and Early Life Inorganic and Methylated Arsenic Exposure on Atherosclerotic Plaque Development and Composition in Adult ApoE<sup>-/-</sup> Mice**

Luis Fernando Negro Silva, Kiran Makhani, Maryse Lemaire, Catherine A. Lemarié, Dany Plourde, Alicia M. Bolt, Christopher Chiavatti, D. Scott Bohle, Stéphanie Lehoux, Mark S. Goldberg, and Koren K. Mann

#### **Table of Contents**

**Table S1.** Effect of arsenicals on plasma cholesterol, triglycerides, HDL, LDL, ALT and AST levels of apoE<sup>-/-</sup> male mice.

**Table S2.** Effect of arsenicals on plasma cholesterol, triglycerides, HDL, LDL, ALT and AST levels of apoE<sup>-/-</sup> female mice.

**Table S3.** Comparison between the control groups of apoE<sup>-/-</sup> and apoE<sup>-/-</sup> As3mt<sup>-/-</sup> DKO mice.

**Table S4.** Mean and standard deviations for the apoE<sup>-/-</sup> dataset pertaining to the lesion areas in aortic arch and the aortic sinus.

**Table S5.** Mean and standard deviations for the apoE<sup>-/-</sup> dataset pertaining to the macrophage, lipid, smooth muscle cell and collagen content in the aortic sinus.

**Table S6.** Mean and standard deviations for the apoE<sup>-/-</sup> As3mt<sup>-/-</sup> dataset pertaining to the lesion areas in aortic arch and the aortic sinus.

**Table S1:** Effect of arsenicals on plasma cholesterol, triglycerides, HDL, LDL, ALT and AST levels of apoE<sup>-/-</sup> male mice.

| Groups                 | Cholesterol | Triglycerides | HDL       | LDL        | ALT     | AST      |
|------------------------|-------------|---------------|-----------|------------|---------|----------|
|                        | mmol/L      | mmol/L        | mmol/L    | mmol/L     | U/L     | U/L      |
| Control (5)            | 11.4 ± 2.2  | 1.2 ± 0.2     | 1.7 ± 0.2 | 9.1 ± 2.0  | 56 ± 19 | 129 ± 32 |
| NaAsO <sub>2</sub> (7) | 14.1 ± 3.8  | 1.4 ± 0.5     | 1.8 ± 0.3 | 11.6 ± 3.7 | 53 ± 10 | 104 ± 24 |
| MMA V (4)              | 15.5 ± 1.9  | 1.6 ± 0.5     | 2.0 ± 0.2 | 12.8 ± 1.7 | 56 ± 15 | 117 ± 23 |
| MMA III (5)            | 17.3 ± 3.3  | 1.9 ± 0.6     | 2.2 ± 0.3 | 14.3 ± 3.0 | 65 ± 20 | 111 ± 46 |
| DMA V (4)              | 15.2 ± 2.5  | 1.3 ± 0.3     | 2.0 ± 0.3 | 12.5 ± 2.2 | 61 ± 13 | 144 ± 46 |

**Note:** The numbers in parentheses represent the number of animals used for all the parameters in each of the exposure groups.

**Table S2:** Effect of arsenicals on plasma cholesterol, triglycerides, HDL, LDL, ALT and AST levels of apoE<sup>-/-</sup> female mice.

| Groups                 | Cholesterol | Triglycerides | HDL       | LDL        | ALT     | AST      |
|------------------------|-------------|---------------|-----------|------------|---------|----------|
|                        | mmol/L      | mmol/L        | mmol/L    | mmol/L     | U/L     | U/L      |
| Control (4)            | 13.3 ± 0.4  | 1.5 ± 0.3     | 1.7 ± 0.1 | 10.8 ± 0.3 | 44 ± 5  | 104 ± 15 |
| NaAsO <sub>2</sub> (5) | 13.3 ± 4.1  | 1.4 ± 0.5     | 1.6 ± 0.2 | 10.9 ± 3.8 | 42 ± 7  | 111 ± 32 |
| MMA V (4)              | 18.2 ± 1.4  | 1.6 ± 0.5     | 1.7 ± 0.2 | 15.7 ± 1.7 | 38 ± 7  | 124 ± 44 |
| MMA III (4)            | 14.6 ± 6.2  | 1.6 ± 0.6     | 1.7 ± 0.3 | 11.1 ± 4.5 | 43 ± 16 | 114 ± 20 |
| DMA V (4)              | 17.0 ± 2.8  | 1.1 ± 0.2     | 1.6 ± 0.1 | 14.8 ± 3.0 | 58 ± 23 | 149 ± 89 |

**Note:** The numbers in parentheses represent the number of animals used for all the parameters in each of the exposure groups.

**Table S3: Comparison between the control groups of *apoe*<sup>-/-</sup> and *apo*<sup>-/-</sup> *As3mt*<sup>-/-</sup> DKO mice**

|          |               | Arch                   |         | Sinus                   |         |                    |         |
|----------|---------------|------------------------|---------|-------------------------|---------|--------------------|---------|
|          |               | (% of total arch area) |         | (% of total sinus area) |         | mm <sup>2</sup>    |         |
| Genotype |               | Relative change        | p-value | Relative change         | p-value | Relative change    | p-value |
|          |               | (95% CI)               |         | (95% CI)                |         | (95% CI)           |         |
| DKO      | All offspring | 4.4 (0.7, 8.2)         | 0.02    | 5.0 (0.7, 9.3)          | 0.02    | 0.04 (0, 0.09)     | 0.06    |
|          | Females       | 7.2 (2.9, 11.5)        | <0.01   | 7.1 (-0.6, 14.8)        | 0.07    | 0.05 (-0.02, 0.13) | 0.17    |
|          | Males         | 3.9 (-0.4, 8.2)        | 0.07    | 2.7 (-0.1, 5.6)         | 0.06    | 0.04 (0, 0.07)     | 0.06    |

**Table S4: Mean and standard deviations for the apoE<sup>-/-</sup> dataset pertaining to the lesion areas in aortic arch and the aortic sinus.**

| Groups             | Lesion area <sup>a</sup> |          |          | Lesion area <sup>b</sup> |           |          | Lesion area <sup>c</sup> |           |           |
|--------------------|--------------------------|----------|----------|--------------------------|-----------|----------|--------------------------|-----------|-----------|
|                    | (% total arch area)      |          |          | (%total sinus area)      |           |          | (mm <sup>2</sup> )       |           |           |
|                    | Mean ± SD                |          |          | Mean ± SD                |           |          | Mean ± SD                |           |           |
|                    | All litters              | Females  | Males    | All litters              | Females   | Males    | All litters              | Females   | Males     |
| Control            | 2.7±1.8                  | 3.0±2.1  | 2.6±1.5  | 9.0±5.5                  | 12.8±5.2  | 5.6±2.9  | 0.06±0.04                | 0.09±0.04 | 0.04±0.02 |
| NaAsO <sub>2</sub> | 5.4±3.0                  | 5.6±3.0  | 5.3±3.0  | 13.0±7.1                 | 14.5±7.9  | 10.5±4.4 | 0.08±0.06                | 0.09±0.06 | 0.07±0.05 |
| MMA III            | 13.3±6.3                 | 15.1±7.2 | 10.2±2.1 | 19.8±10.8                | 22.4±11.3 | 14.5±6.9 | 0.15±0.14                | 0.19±0.15 | 0.06±0.03 |
| MMA V              | 10.8±4.5                 | 12.0±3.9 | 9.9±5.0  | 12.7±6.6                 | 14.1±5.1  | 11.5±7.6 | 0.07±0.04                | 0.07±0.02 | 0.07±0.05 |
| DMA V              | 10.9±4.5                 | 10.7±4.5 | 11.1±4.6 | 15.6±7.1                 | 19.2±8.6  | 13.3±5.5 | 0.12±0.08                | 0.15±0.12 | 0.09±0.05 |

**Note:** The averages and standard deviations were calculated for complete litters as well as separately for female and male offspring for plaque size in the aortic arch and the aortic sinus pertaining to all the groups. The graphical data distribution is depicted in figures 1 and 2 and the data adjusted by sex and litter is presented in Tables 2 and 3.

SD, standard deviation

<sup>a</sup> Percentage of oil red O (ORO) stained area over the total arch area; Number of apoE<sup>-/-</sup> litters (N)= Control: 12, NaAsO<sub>2</sub>: 9, MMA III: 4, MMA V: 5; DMA V: 5

<sup>b</sup> Percentage of ORO-stained lesion area over the total sinus area; Number of apoE<sup>-/-</sup> litters (N)= Control: 12, NaAsO<sub>2</sub>: 9, MMA III: 4, MMA V: 4; DMA V: 4

<sup>c</sup> Absolute lesion area as measured by the ORO-staining; Number of apoE<sup>-/-</sup> litters (N)= Control: 12, NaAsO<sub>2</sub>: 9, MMA III: 4, MMA V: 4; DMA V: 4

**Table S5: Mean and standard deviations for the apoE<sup>-/-</sup> dataset pertaining to the macrophage, lipid, smooth muscle cell and collagen content in the aortic sinus.**

| Groups             | Macrophages <sup>a</sup> |          |          | Lipids <sup>b</sup>      |          |          | Smooth Muscle Cells <sup>c</sup> |          |          | Collagen <sup>d</sup>    |          |           |
|--------------------|--------------------------|----------|----------|--------------------------|----------|----------|----------------------------------|----------|----------|--------------------------|----------|-----------|
|                    | (% of sinus lesion area) |          |          | (% of sinus lesion area) |          |          | (% of sinus lesion area)         |          |          | (% of sinus lesion area) |          |           |
|                    | Mean ± SD                |          |          | Mean ± SD                |          |          | Mean ± SD                        |          |          | Mean ± SD                |          |           |
|                    | All litters              | Females  | Males    | All litters              | Females  | Males    | All litters                      | Females  | Males    | All litters              | Females  | Males     |
| Control            | 27.8±5.4                 | 29.3±3.7 | 26.0±7.0 | 32.4±6.3                 | 34.2±7.2 | 30.3±3.9 | 30.7±6.4                         | 26.7±3.2 | 33.7±7.4 | 39.5±7.4                 | 35.2±3.1 | 44.3±8.1  |
| NaAsO <sub>2</sub> | 24.3±4.3                 | 24.6±3.0 | 24.1±4.7 | 35.6±3.4                 | 36.1±3.3 | 35.0±3.4 | 25.8±4.0                         | 27.5±3.8 | 23.7±3.0 | 39.2±6.8                 | 42.7±6.0 | 35.0±5.3  |
| MMA III            | 25.2±3.7                 | 24.7±4.0 | 26.0±2.8 | 34.5±4.9                 | 36.0±5.0 | 33.1±4.8 | 27.3±4.0                         | 25.7±4.0 | 29.3±3.4 | 40.6±6.8                 | 41.7±5.3 | 39.5±8.3  |
| MMA V              | 26.9±4.2                 | 27.4±5.1 | 24.1±3.6 | 35.5±4.6                 | 43.7±3.6 | 43.7±5.2 | 27.4±4.3                         | 27.0±3.9 | 27.9±5.5 | 38.5±6.0                 | 37.9±6.3 | 39.0±5.9  |
| DMA V              | 23.9±5.7                 | 23.5±6.4 | 26.3±5.6 | 41.7±4.4                 | 34.2±4.1 | 37.1±4.1 | 24.7±3.5                         | 24.7±4.5 | 24.8±2.4 | 34.1±8.4                 | 41.1±6.7 | 28.15±3.5 |

**Note:** The averages and standard deviations were calculated for macrophage, lipid, smooth muscle cell and collagen content in the control and treated groups. These values are presented for complete litters as well as for female and male offspring. The graphical data distribution is depicted in figures 3 and 4 and the data adjusted by sex and litter is presented in Tables 4 and 5.

SD, standard deviation

<sup>a</sup> Percentage of moma-2 antibody stained area over the total lesion area in the aortic sinus as measured by the intensity of fluorescent signal at 488 nm; Number of apoE<sup>-/-</sup> litters (N)= Control: 6, NaAsO<sub>2</sub>: 3, MMA III: 4, MMA V: 3; DMA V: 4

<sup>b</sup> Percentage of oil red O (ORO)-stained area over the total lesion area in the aortic sinus; Number of apoE<sup>-/-</sup> litters (N)= Control: 6, NaAsO<sub>2</sub>: 3, MMA III: 4, MMA V: 3; DMA V: 4

<sup>c</sup> Percentage of total SMA $\alpha$  antibody-stained area over the total lesion area in the aortic sinus as measured by the intensity of fluorescent signal at 488 nm; Number of apoE<sup>-/-</sup> litters (N)= Control: 6, NaAsO<sub>2</sub>: 3, MMA III: 4, MMA V: 3; DMA V: 3

<sup>d</sup> Percentage of picosirius red-stained area over the total lesion area in the aortic sinus; Number of apoE<sup>-/-</sup> litters (N)= Control: 6, NaAsO<sub>2</sub>: 3, MMA III: 3, MMA V: 3; DMA V: 3

**Table S6: Mean and standard deviations for the apoE<sup>-/-</sup> As3mt<sup>-/-</sup> dataset pertaining to the lesion areas in aortic arch and the aortic sinus.**

| Groups             | Lesion area <sup>a</sup> |          |         | Lesion area <sup>b</sup> |          |          | Lesion area <sup>c</sup> |           |           |
|--------------------|--------------------------|----------|---------|--------------------------|----------|----------|--------------------------|-----------|-----------|
|                    | (% total arch area)      |          |         | (%total sinus area)      |          |          | (mm <sup>2</sup> )       |           |           |
|                    | Mean ± SD                |          |         | Mean ± SD                |          |          | Mean ± SD                |           |           |
|                    | All litters              | Females  | Males   | All litters              | Females  | Males    | All litters              | Females   | Males     |
| Control            | 7.1±6.9                  | 7.7±6.4  | 6.6±7.6 | 14.0±7.6                 | 20.1±6.0 | 8.2±4.2  | 0.10±0.08                | 0.13±0.09 | 0.07±0.07 |
| NaAsO <sub>2</sub> | 9.6±5.4                  | 10.8±5.1 | 8.2±5.4 | 13.0±5.4                 | 14.8±6.3 | 10.9±3.2 | 0.09±0.1                 | 0.11±0.13 | 0.07±0.07 |

**Note:** The averages and standard deviations were calculated for complete litters as well as separately for female and male offspring for plaque size in the aortic arch and the aortic sinus pertaining to all the groups. The graphical data distribution is depicted in figures 5 and 6 and the data adjusted by sex and litter is presented in Tables 6 and 7.

SD, standard deviation; Number of DKO litters (N)= Control: 4, NaAsO<sub>2</sub>: 4

<sup>a</sup> Percentage of oil red O (ORO) stained area over the total arch area

<sup>b</sup> Percentage of ORO-stained lesion area over the total sinus area

<sup>c</sup> Absolute lesion area as measured by the ORO-staining
