# Supplementary material
Source: PubMed Central journal article supplement (PMC8136521)
Supplement: ehp8171.smcontents.508.pdf [file ehp8171.smcontents.508.pdf]

**Note to readers with disabilities:** *EHP* strives to ensure that all journal content is accessible to all readers. However, some figures and Supplemental Material published in *EHP* articles may not conform to [508 standards](#) due to the complexity of the information being presented. If you need assistance accessing journal content, please contact [ehp508@niehs.nih.gov](mailto:ehp508@niehs.nih.gov). Our staff will work with you to assess and meet your accessibility needs within 3 working days.

### **Supplemental Material**

#### **Sex-Specific Effects of Prenatal and Early Life Inorganic and Methylated Arsenic Exposure on Atherosclerotic Plaque Development and Composition in Adult ApoE<sup>-/-</sup> Mice**

Luis Fernando Negro Silva, Kiran Makhani, Maryse Lemaire, Catherine A. Lemarié, Dany Plourde, Alicia M. Bolt, Christopher Chiavatti, D. Scott Bohle, Stéphanie Lehoux, Mark S. Goldberg, and Koren K. Mann

#### **Table of Contents**

**Table S1.** Effect of arsenicals on plasma cholesterol, triglycerides, HDL, LDL, ALT and AST levels of apoE<sup>-/-</sup> male mice.

**Table S2.** Effect of arsenicals on plasma cholesterol, triglycerides, HDL, LDL, ALT and AST levels of apoE<sup>-/-</sup> female mice.

**Table S3.** Comparison between the control groups of apoE<sup>-/-</sup> and apoE<sup>-/-</sup> As3mt<sup>-/-</sup> DKO mice.

**Table S4.** Mean and standard deviations for the apoE<sup>-/-</sup> dataset pertaining to the lesion areas in aortic arch and the aortic sinus.

**Table S5.** Mean and standard deviations for the apoE<sup>-/-</sup> dataset pertaining to the macrophage, lipid, smooth muscle cell and collagen content in the aortic sinus.

**Table S6.** Mean and standard deviations for the apoE<sup>-/-</sup> As3mt<sup>-/-</sup> dataset pertaining to the lesion areas in aortic arch and the aortic sinus.
